# Supplementary material for: Novel PTRF mutation in a child with mild myopathy and very mild congenital lipodystrophy
Source: PubMed Central journal article supplement (PMC3846852; doi:10.1186/1471-2350-14-89), 2013-09-11
Supplement: 1471-2350-14-89-S1.pdf [file 1471-2350-14-89-S1.pdf]

CLUSTAL 2.1 multiple sequence alignment

```
Original      ACCTGATTCCGTTCCCTCAGCTCGCATTCCCTCCGCCCGTCCCGCTCCCGCCGCCAGCGGAG 60
Mutated      ACCTGATTCCGTTCCCTCAGCTCGCATTCCCTCCGCCCGTCCCGCTCCCGCCGCCAGCGGAG 60
*****

Original      GCCCTAGTCTCCCGCTCCAACCTATTCCAACCATCCCGGGAAGGGTGGGGCGCTCGGCTCT 120
Mutated      GCCCTAGTCTCCCGCTCCAACCTATTCCAACCATCCCGGGAAGGGTGGGGCGCTCGGCTCT 120
*****

Original      TGGGTCCCCCTCCGCCGCCCGCCTCGTCGATCTCCCCTTCTGCCCGGTCCCTCCCTTT 180
Mutated      TGGGTCCCCCTCCGCCGCCCGCCTCGTCGATCTCCCCTTCTGCCCGGTCCCTCCCTTT 180
*****

Original      CTGGGGTGGGGCCAGCCAATCAGCGATCAGACTCCGGAGTTTGGCCCAGGAGCTGGGGAG 240
Mutated      CTGGGGTGGGGCCAGCCAATCAGCGATCAGACTCCGGAGTTTGGCCCAGGAGCTGGGGAG 240
*****

Original      CTCACCGATCCCCGCCAGCAGTTCTGGCCGCTGTCCCGGTGCGCACGGACGTGGCTCG 300
Mutated      CTCACCGATCCCCGCCAGCAGTTCTGGCCGCTGTCCCGGTGCGCACGGACGTGGCTCG 300
*****

Original      AGTTTCCTCTGCTCTCCGCTCTCGCCGCTAGCTCTCCTCCCTTCCGCTCCTGCTTCTCT 360
Mutated      AGTTTCCTCTGCTCTCCGCTCTCGCCGCTAGCTCTCCTCCCTTCCGCTCCTGCTTCTCT 360
*****

Original      CCGGGTCTCCCGCTCCAGCTCCAGCCCCACCCGGCCGGTCCCGCACGGCTCCGGGTAGCC 420
Mutated      CCGGGTCTCCCGCTCCAGCTCCAGCCCCACCCGGCCGGTCCCGCACGGCTCCGGGTAGCC 420
*****

Original      ATGGAGGACCCACGCTCTATATTGTCGAGCGGCCGCTTCCCGGTACCCCGACGCCGAG 480
Mutated      ATGGAGGACCCACGCTCTATATTGTCGAGCGGCCGCTTCCCGGTACCCCGACGCCGAG 480
*****

Original      GCCCCGAGCCTTCTCCGCTGGGGCTCAGGCAGCGGAGGAGCCGTCGGGGGCCGGCTCA 540
Mutated      GCCCCGAGCCTTCTCCGCTGGGGCTCAGGCAGCGGAGGAGCCGTCGGGGGCCGGCTCA 540
*****

Original      GAAGAGCTGATCAAGTCGGACCAGGTGAACGGCGTGCTGGTGCTGAGCCTCCTGGACAAA 600
Mutated      GAAGAGCTGATCAAGTCGGACCAGGTGAACGGCGTGCTGGTGCTGAGCCTCCTGGACAAA 600
*****

Original      ATCATCGGGCCGTAGACCAGATCCAGCTGACTCAAGCACAGCTGGAGGAGCGGCAGGCG 660
Mutated      ATCATCGGGCCGTAGACCAGATCCAGCTGACTCAAGCACAGCTGGAGGAGCGGCAGGCG 660
*****

Original      GAGATGGAGGGCGCAGTGCAGAGCATCCAGGGCGAGCTGAGCAAGCTGGGCAAGGCGCAC 720
Mutated      GAGATGGAGGGCGCAGTGCAGAGCATCCAGGGCGAGCTGAGCAAGCTGGGCAAGGCGCAC 720
*****

Original      GCCACCACGAGCAATACGGTGAGCAAGCTGCTGGAGAAGGTGCGCAAGGTCAGCGTCAAC 780
Mutated      GCCACCACGAGCAATACGGTGAGCAAGCTGCTGGAGAAGGTGCGCAAGGTCAGCGTCAAC 780
*****

Original      GTGAAGACCGTGCGCGGCAGCCTGGAGGCCAGGCGGGGCAGATCAAGAAGCTGGAGGTC 840
Mutated      GTGAAGACCGTGCGCGGCAGCCTGGAGGCCAGGCGGGGCAGATCAAGAAGCTGGAGGTC 840
*****

Original      AACGAGGCCGAGCTGCTGCGGCGCCGCAACTTTAAAGTCATGATCTACCAGGATGAAGTG 900
Mutated      AACGAGGCCGAGCTGCTGCGGCGCCGCAACTTTAAAGTCATGATCTACCAGGATGAAGTG 900
*****
```

|          |                                                               |      |
|----------|---------------------------------------------------------------|------|
| Original | AAGCTGCCGGCCAAACTGAGCATCAGCAAATCGCTGAAAGAGTCGGAGGCGCTGCCAGAG  | 960  |
| Mutated  | AAGCTGCCGGCCAAACTGAGCATCAGCAAATCGCTGAAAGAGTCGGAGGCGCTGCCAGAG  | 960  |
|          | *****                                                         |      |
| Original | AAGGAGGGCGAGGAGCTGGGCGAGGGCGAGCGGCCCGAGGAGGACGCAGCGGCGCTGGAG  | 1020 |
| Mutated  | AAGGAGGGCGAGGAGCTGGGCGAGGGCGAGCGGCCCGAGGAGGACGCAGCGGCGCTGGAG  | 1020 |
|          | *****                                                         |      |
| Original | CTTTCGTCCGACGAGGCGGTGGAGGTTGAGGAGGTTATTGAGGAGTCCC GCGCAGAGCGT | 1080 |
| Mutated  | CTTTCGTCCGACGAGGCGGTGGAGGTTGAGGAGGTTATTGAGGAGTCCC GCGCAGAGCGT | 1080 |
|          | *****                                                         |      |
| Original | ATCAAGCGCAGCGGCCTGCGGCGCGTGGACGACTTCAAGAAGGCCTTCTCCAAGGAGAAG  | 1140 |
| Mutated  | ATCAAGCGCAGCGGCCTGCGGCGCGTGGACGACTTCAAGAAGGCCTTCTCCAAGGAGAAG  | 1140 |
|          | *****                                                         |      |
| Original | ATGGAGAAGACCAAGGTGCGTACCCGCGAGAACC TGGAGAAGACGCGCCTCAAGACCAAG | 1200 |
| Mutated  | ATGGAGAAGACCAAGGTGCGTACCCGCGAGAACC TGGAGAAGACGCGCCTCAAGACCAAG | 1200 |
|          | *****                                                         |      |
| Original | GAAAACCTGGAGAAGACGCGGCACACCCTGGAGAAGCGCATGAACAAGCTGGGCACGCGC  | 1260 |
| Mutated  | GAAAACCTGGAGAAGACGCGGCACACCCTGGAGAAGCGCATGAACAAGCTGGGCACGCGC  | 1260 |
|          | *****                                                         |      |
| Original | CTGGTGCCCGCCGAGCGGCGCGAGAAACTGAAGACGTCGCGGGACAAGTTGCGCAAATCC  | 1320 |
| Mutated  | CTGGTGCCCGCCGAGCGGCGCGAGAAACTGAAGACGTCGCGGGACAAGTTGCGCAAATCC  | 1320 |
|          | *****                                                         |      |
| Original | TTCACGCCCGACCACGTGGTGTACGCGCGCTCCAAGACCGCGGTCTCAAGGTGCCACCC   | 1380 |
| Mutated  | TTCACGCCCGACCACGTGGTGTACGCGCGCTCCAAGACCGCGGTCTCAAGGTGCCACCC   | 1379 |
|          | *****                                                         |      |
| Original | TTCACCTTCCACGTCAAGAAGATCCGCGAGGGCCAGGTGGAAGTGCTCAAGGCCACCGAG  | 1440 |
| Mutated  | TTCACCTTCCACGTCAAGAAGATCCGCGAGGGCCAGGTGGAAGTGCTCAAGGCCACCGAG  | 1439 |
|          | *****                                                         |      |
| Original | ATGGTGGAGGTGGGCGCCGACGACGACGAGGGCGGCGGAGCGCGGGGAGGCCGGCGAC    | 1500 |
| Mutated  | ATGGTGGAGGTGGGCGCCGACGACGACGAGGGCGGCGGAGCGCGGGGAGGCCGGCGAC    | 1499 |
|          | *****                                                         |      |
| Original | CTGCGGCGCGGGAGCAGCCCCGACGTGCACGCGCTGCTGGAGATCACCGAGGAGTCGGAC  | 1560 |
| Mutated  | CTGCGGCGCGGGAGCAGCCCCGACGTGCACGCGCTGCTGGAGATCACCGAGGAGTCGGAC  | 1559 |
|          | *****                                                         |      |
| Original | GCCGTGCTGGTGGACAAGAGCGACAGCGACTGAG-----                       | 1593 |
| Mutated  | GCCGTGCTGGTGGACAAGAGCGACAGCGACTGAGCGCCCGCTGCCACCCACCCATT      | 1619 |
|          | *****                                                         |      |
| Original | -----                                                         |      |
| Mutated  | CCTCGCTCCTTCCGAACTTCTCTTCGTCATCTCTCTCGGCTCGAGCTGGCTGA         | 1674 |
